# Supplementary material for: Gut Microbiota Mediates the Protective Effects of Traditional Chinese Medicine Formula Qiong-Yu-Gao against Cisplatin-Induced Acute Kidney Injury
Source: PubMed Central journal article supplement (PMC9241845; doi:10.1128/spectrum.00759-22), 2022-04-28
Supplement: spectrum.00759-22-s001.pdf [file spectrum.00759-22-s001.pdf]

Supporting Information for

**Gut microbiota mediates the protective effects of traditional Chinese medicine formula Qiong-Yu-Gao against cisplatin-induced acute kidney injury**

**Ye-Ting Zou<sup>a,b</sup>, Jing Zhou<sup>a</sup>, Jin-Hao Zhu<sup>a,b</sup>, Cheng-Ying Wu<sup>a</sup>, Hong Shen<sup>b</sup>, Wei Zhang<sup>a</sup>, Shan-Shan Zhou<sup>b</sup>, Jin-Di Xu<sup>a</sup>, Qian Mao<sup>b</sup>, Ye-Qing Zhang<sup>c</sup>, Fang Long<sup>a,c,#</sup>, Song-Lin Li<sup>a,b,#</sup>**

*<sup>a</sup>Department of Pharmaceutical Analysis, Affiliated Hospital of Integrated Traditional Chinese and Western Medicine, Nanjing University of Chinese Medicine, Nanjing, China.*

*<sup>b</sup>Department of Metabolomics, Jiangsu Province Academy of Traditional Chinese Medicine, Nanjing, China.*

*<sup>c</sup>Department of Respiratory Medicine, Affiliated Hospital of Integrated Traditional Chinese and Western Medicine, Nanjing University of Chinese Medicine, Nanjing, China.*

**Running Head:** Gut microbiota mediates nephroprotective effects of Qiong-Yu-Gao

#Address correspondence to Song-Lin Li, [songlinli64@126.com](mailto:songlinli64@126.com), or Fang Long, [longfangcpu@163.com](mailto:longfangcpu@163.com).

## 1 **Supplementary materials and methods**

### 2 **1. Characterization of prepared QYG samples**

#### 3 *1.1. molecular weight distribution of polysaccharide*

4 For chemical profiling of QYG, the prepared samples were diluted with 5-fold of water,  
5 and subsequently precipitated by adding ethanol to a final concentration of 75% (v/v),  
6 left overnight at 4 °C. Lyophilized residue polysaccharide (40 mg) was dissolved in 5  
7 mL of water, and submitted to HPGPC equipped with a TSK-gel G4000PWXL column  
8 (300 mm×7.8 mm i.d., 10 μm) under a constant flow (0.5 mL/min) at 35 °C. The column  
9 temperature was 35 °C. The injection volume of sample was 20 μL. The elute was  
10 monitored by an evaporative light-scattering detector with nitrogen as nebulizer gas  
11 (pressure: 40 psi). the drift tube temperature was 90 °C. The molecular weight  
12 distribution was estimated by the calibration curve made from a series of Dextran  
13 reference (1-2000 kDa, Fig. S4).

#### 14 *1.2. Monosaccharide composition of polysaccharide*

15 Accurately weighed 40 mg of lyophilized residue polysaccharide in 3 mL of  
16 trifluoroacetic acid (2 mol/L) was heated at 120 °C for 2 h to hydrolysis. The resulting  
17 solution was then evaporated and subjected to derivatization by 1-phenyl-3-methyl-5-  
18 pyrazolne (PMP). After derivatization, PMP derivatives of monosaccharides were  
19 analysed by HPLC using Grace Alltima™ C18 column (250 mm×7.8 mm i.d., 5 μm)  
20 with a flow rate of 1 mL/min. The column temperature was maintained at 35 °C and the

21 wavelength of the UV detector was set at 245 nm. The mobile phase consisted of (A)  
22 acetonitrile and (B) 0.1 mol/L ammonium acetate solution. A linear gradient elution  
23 program was set as follows: 0–8 min, 16–20% A; 8–25 min, 20–25% A; 25–27 min,  
24 25–90% A. The injection volume of sample was 10  $\mu$ L. The monosaccharide  
25 composition was determined by comparing with the standard monosaccharides  
26 derivatized with PMP (Fig. S5).

### 27 ***1.3. Characterization of the supernatant***

28 Accurately weighed 65 mg of lyophilized supernatant was ultrasonic-extracted with 10  
29 mL of methanol for 30 min. Then, the extracts were filtered through 0.2  $\mu$ m PTFE  
30 syringe and 2.0  $\mu$ L of filtrates were subjected to UPLC-QTOF-MS/MS analysis. Liquid  
31 chromatographic separation was performed on a Waters ACQUITY UPLC™ system  
32 (Waters, MA, USA) equipped with an ACQUITY UPLC HSS T3 column (2.1  $\times$  100  
33 mm, 1.8  $\mu$ m). The column temperature was held at 40  $^{\circ}$ C during the analysis.  
34 Acetonitrile (A) and ultrapure water (B), both containing 0.1% formic acid (v/v) were  
35 used as the mobile phase. The metabolites were eluted at flow rate of 0.4 mL $\cdot$ min<sup>-1</sup>  
36 with the following optimal gradient program: 0–0.5 min, 1% A; 0.5–3.5 min, 1–15%  
37 A; 3.5–15 min, 15–35% A; 15–20 min, 35–40% A; 20–22 min, 40–60% A; 22–27 min,  
38 60–80% A. A Waters Q-TOF Synapt G2 mass spectrometer (Waters MS Technologies,  
39 Manchester, UK) was used for mass detection, and the operation parameters were set  
40 as follows: capillary voltage 2.5 kV; cone voltage 40 V; cone gas flow rate 50 L/h;  
41 source temperature 100  $^{\circ}$ C; desolvation temperature 450  $^{\circ}$ C; desolvation gas flow rate

42 800 L/h. The scan mass range was 100–1200 Da. In MS<sup>E</sup> mode, the trap collision energy  
43 of the low energy function was set at 6 eV, and the high-energy function was ramped  
44 from 30 to 60 eV. Components in the supernatant were identified based on our  
45 previously established methods (Fig. S6 and Table S1).

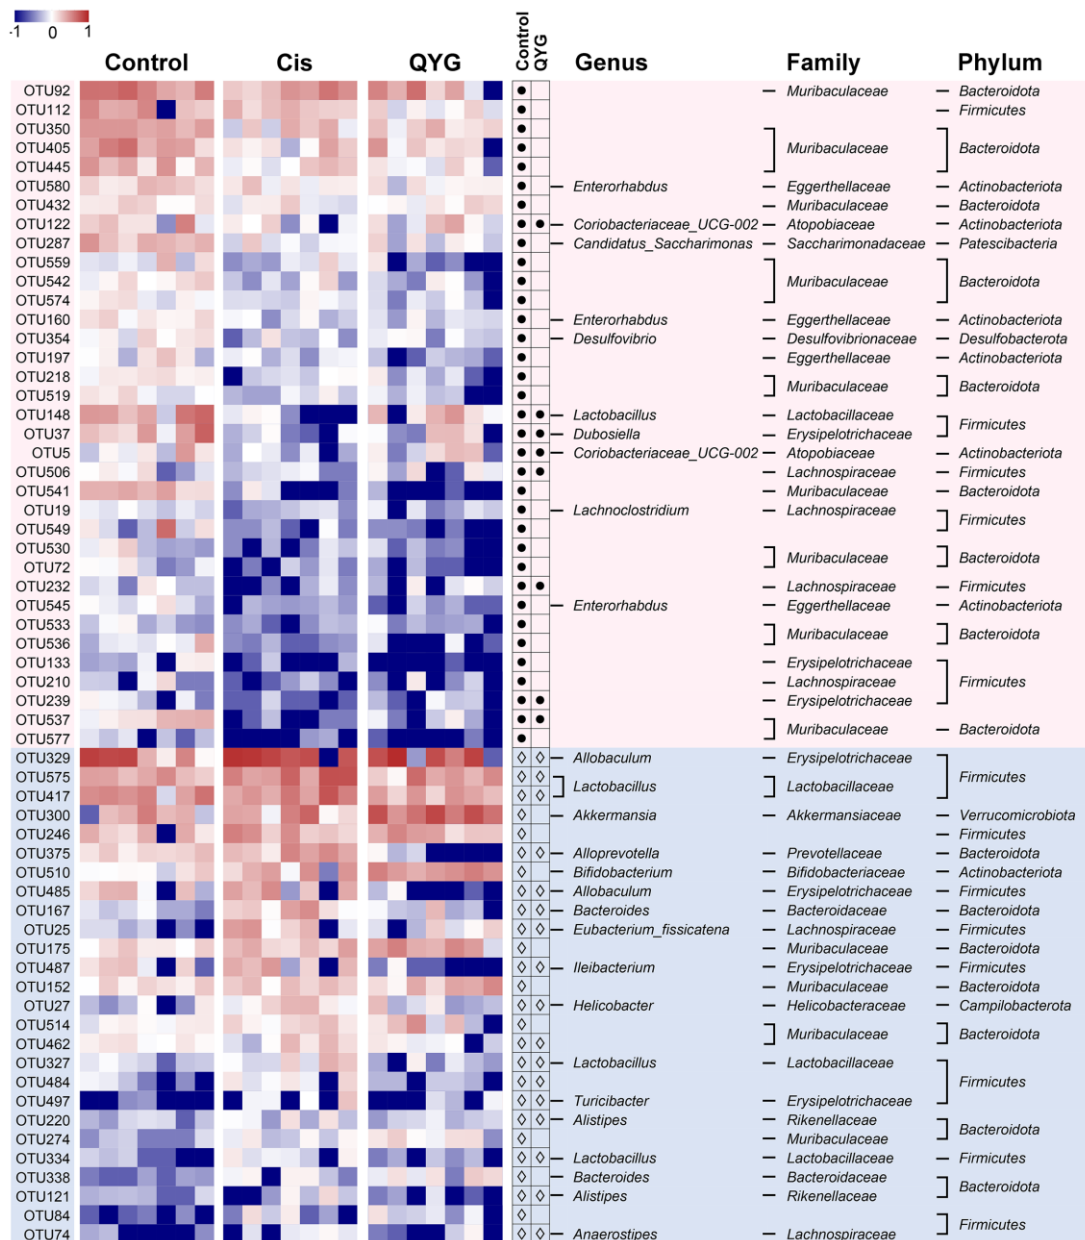

46 **FIG S1** Heatmap of key OTUs responsible for cisplatin-induced bacterial composition  
 47 change. In the middle panel, black dots represent more abundant OTUs in control and  
 48 QYG groups compared with Cis group; white diamonds represent less abundant OTUs  
 49 in control and QYG groups compared with Cis group. Bacterial taxa information (genus,  
 50 family and phylum) of the OTUs is shown on the right panel.

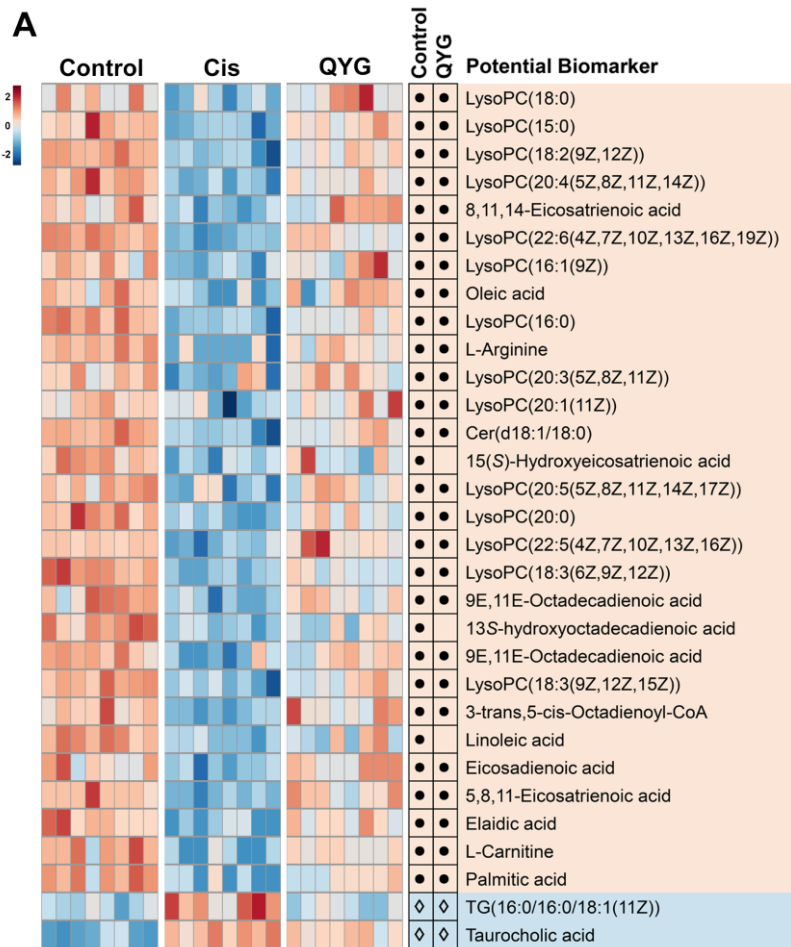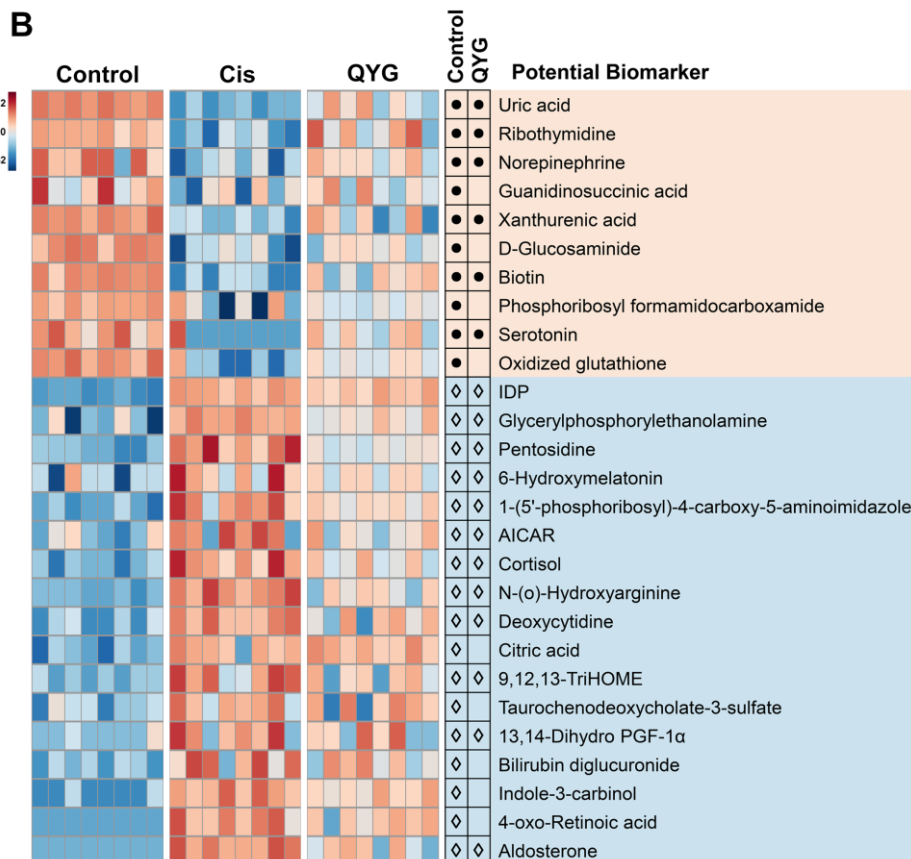

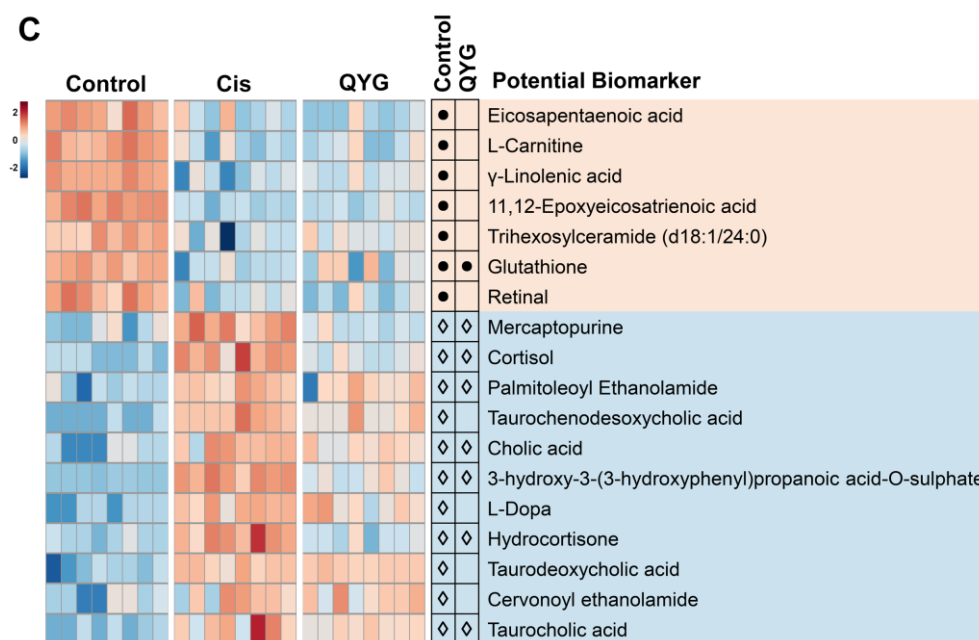

53 **FIG S2** Heatmaps summarizing potential biomarker of cisplatin-induced injury in  
 54 serum (A), urine (B) and renal tissue (C), and their response to QYG treatment. The  
 55 color of the spots in the left presents the relative abundance of metabolites in each group.  
 56 In the middle, the black dot represents more abundant in control and QYG group  
 57 compared with Cis group, while the the white diamond represents less abundant in  
 58 control and QYG group compared with Cis group.

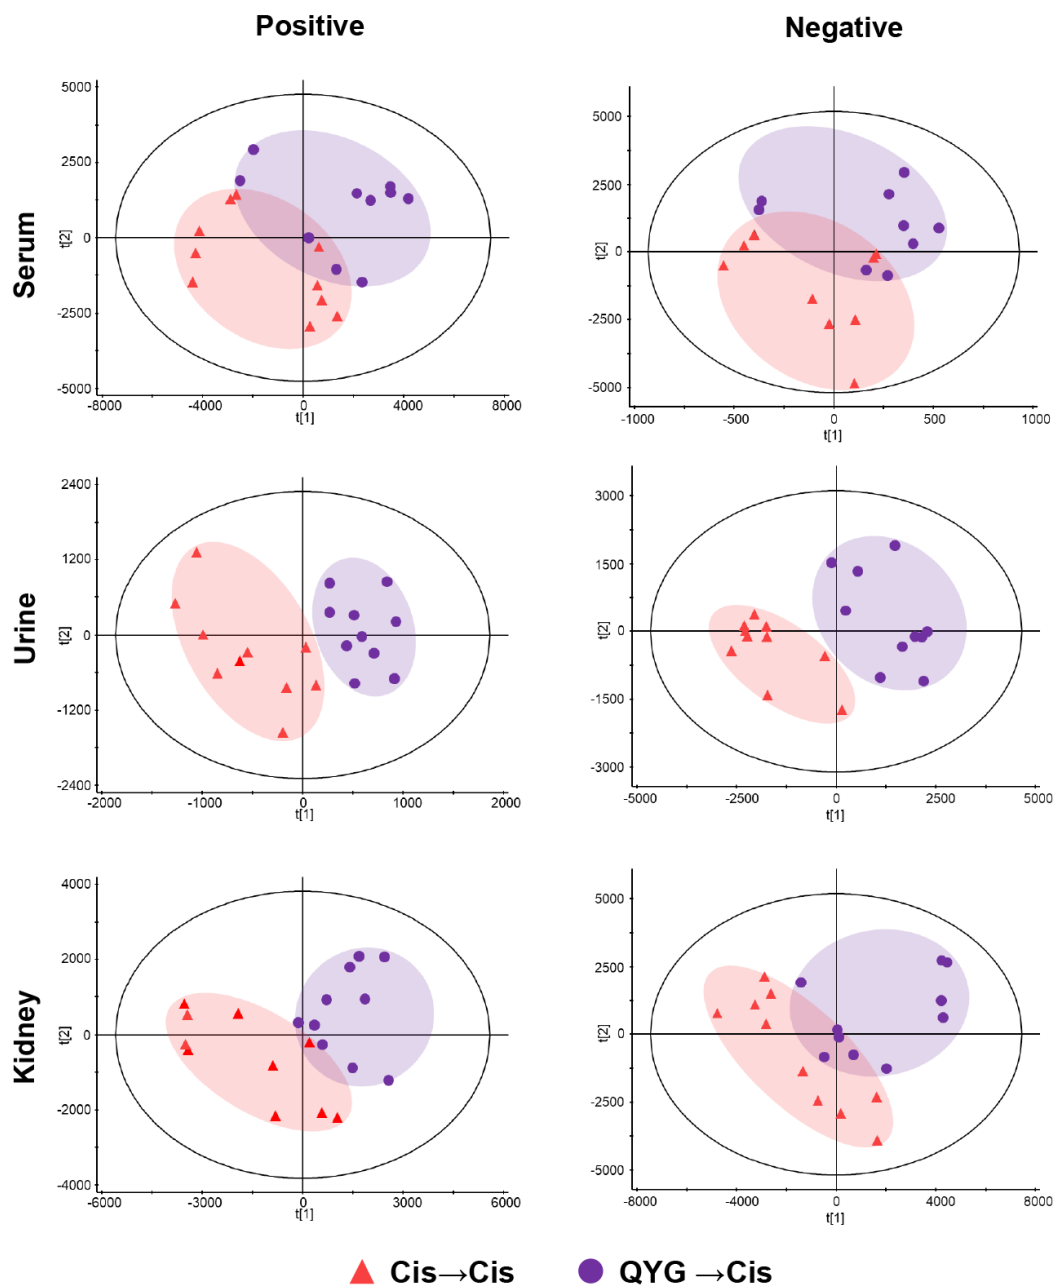

60 **FIG S3** PLS-DA score plots of metabolic profiling of serum, urine and renal tissue in  
 61 positive and negative ion mode.



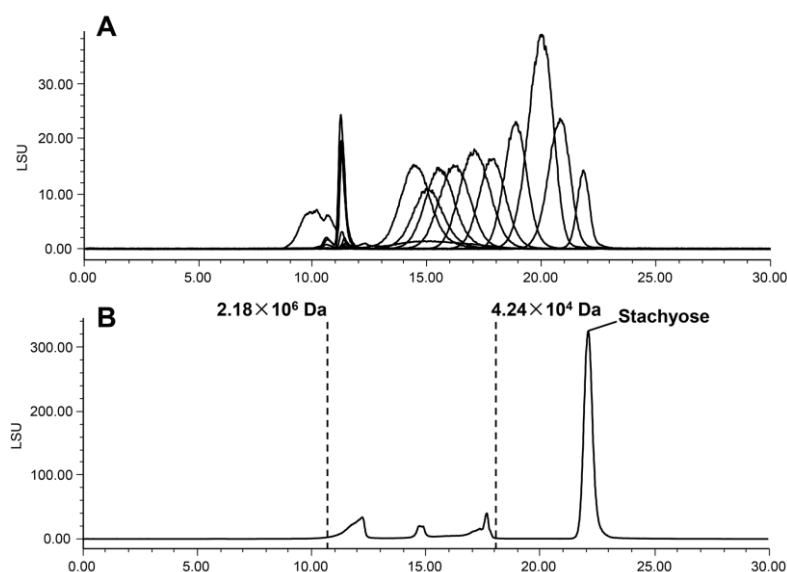

62 **FIG S4** The HPGPC chromatograms of Dextran references (A) and polysaccharides in  
 63 QYG (B). The HPGPC chromatograms showed that the residue polysaccharides have  
 64 a wide molecular weight distribution ranged from  $4.24 \times 10^4$  Da to  $2.18 \times 10^6$  Da.

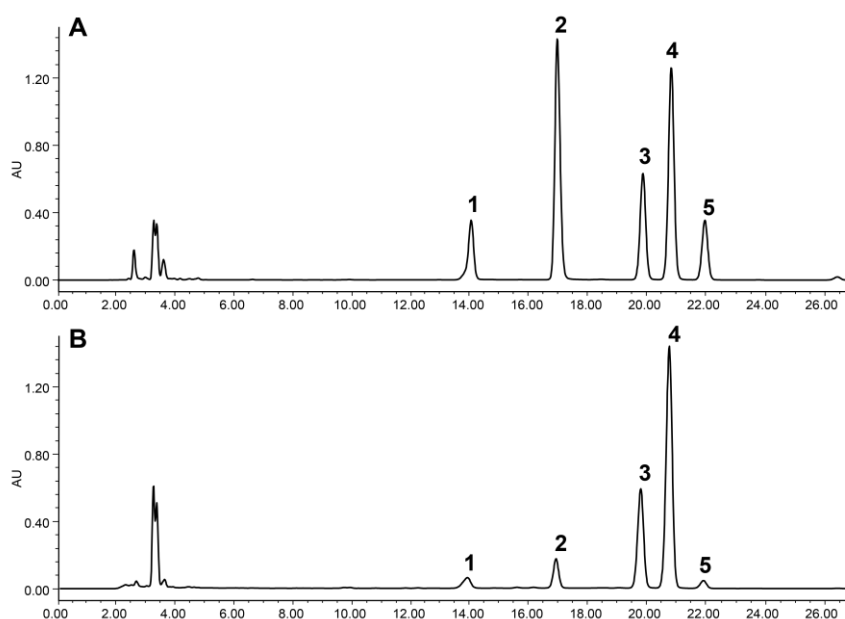

65 **FIG S5** HPLC analysis of standard monosaccharides (A) and hydrolysed  
 66 polysaccharides in QYG (B) derivatized with PMP. The monosaccharide composition  
 67 of residue polysaccharides was determined as mannose, galacturonic acid, glucose,  
 68 galactose and arabinose at a molar ratio of 1.00:4.97:50.19:60.40:3.23. Peaks: 1,  
 69 mannose; 2, galacturonic acid; 3, glucose; 4, galactose; 5, arabinose.

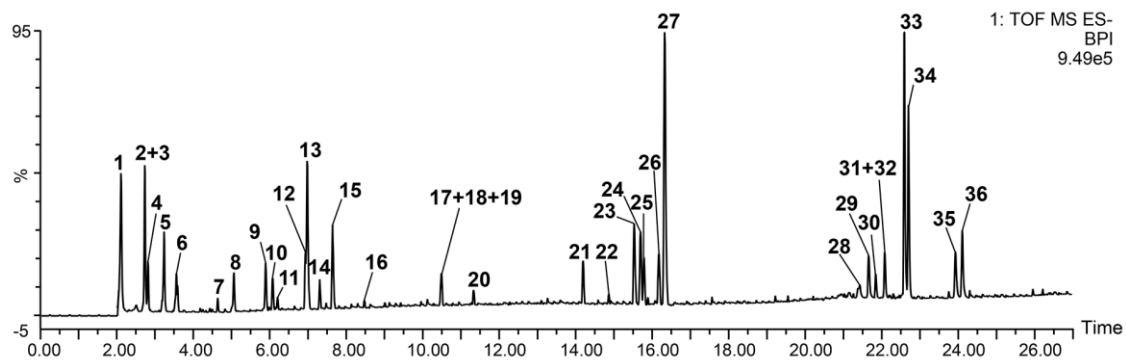

70 **FIG S6** Base peak intensity chromatogram of supernatant analysed by UPLC-QTOF-  
 71 MS/MS. A total of 36 components were identified, and glycosides including catapol,  
 72 acteoside, Rg2, Ro, and 20(S/R)-Rg3 were determined to be the main components.  
 73 Information of 36 identified components is presented in Table S1.

74

75 **TABLE S1** Components identified from supernatant by UPLC-QTOF-MS/MS.

| No. | Identification                          | Formula                                           | $t_R$ | $m/z$                             |
|-----|-----------------------------------------|---------------------------------------------------|-------|-----------------------------------|
| 1   | Catapol                                 | C <sub>15</sub> H <sub>22</sub> O <sub>10</sub>   | 2.11  | [M-H+HCOOH] <sup>-</sup> 407.1185 |
| 2   | Glutinoside                             | C <sub>15</sub> H <sub>23</sub> ClO <sub>10</sub> | 2.73  | [M-H+HCOOH] <sup>-</sup> 443.0955 |
| 3   | Rehmannioside D                         | C <sub>27</sub> H <sub>42</sub> O <sub>20</sub>   | 2.73  | [M-H] <sup>-</sup> 685.2187       |
| 4   | Melittoside                             | C <sub>21</sub> H <sub>32</sub> O <sub>15</sub>   | 2.81  | [M-H+HCOOH] <sup>-</sup> 569.1722 |
| 5   | Leonuride                               | C <sub>15</sub> H <sub>24</sub> O <sub>9</sub>    | 3.23  | [M-H+HCOOH] <sup>-</sup> 393.1391 |
| 6   | 8-Epiloganic acid/isomer                | C <sub>16</sub> H <sub>24</sub> O <sub>10</sub>   | 3.55  | [M-H] <sup>-</sup> 375.1278       |
| 7   | Darendoside A                           | C <sub>21</sub> H <sub>32</sub> O <sub>12</sub>   | 4.64  | [M-H] <sup>-</sup> 475.1810       |
| 8   | Echinacoside                            | C <sub>35</sub> H <sub>46</sub> O <sub>20</sub>   | 5.06  | [M-H] <sup>-</sup> 785.2517       |
| 9   | Jionoside A1/Jionoside A2               | C <sub>36</sub> H <sub>48</sub> O <sub>20</sub>   | 5.89  | [M-H] <sup>-</sup> 799.2681       |
| 10  | Rehmapicrogenin                         | C <sub>10</sub> H <sub>16</sub> O <sub>3</sub>    | 6.07  | [M-H] <sup>-</sup> 183.1008       |
| 11  | Rehmaionoside A/Rehmaionoside B         | C <sub>19</sub> H <sub>34</sub> O <sub>8</sub>    | 6.20  | [M-H+HCOOH] <sup>-</sup> 435.2219 |
| 12  | Rehmaionoside A/Rehmaionoside B         | C <sub>19</sub> H <sub>34</sub> O <sub>8</sub>    | 6.92  | [M-H+HCOOH] <sup>-</sup> 435.2238 |
| 13  | Acteoside                               | C <sub>29</sub> H <sub>36</sub> O <sub>15</sub>   | 6.97  | [M-H] <sup>-</sup> 623.1989       |
| 14  | Jionoside B1/Jionoside B2               | C <sub>37</sub> H <sub>50</sub> O <sub>20</sub>   | 7.30  | [M-H] <sup>-</sup> 813.2847       |
| 15  | Isoacteoside/ Forsythiaside             | C <sub>29</sub> H <sub>36</sub> O <sub>15</sub>   | 7.63  | [M-H] <sup>-</sup> 623.1981       |
| 16  | Cis-Leucosceptoside A/Leucosceptoside A | C <sub>30</sub> H <sub>38</sub> O <sub>15</sub>   | 8.47  | [M-H] <sup>-</sup> 637.2141       |
| 17  | Rg <sub>1</sub>                         | C <sub>42</sub> H <sub>72</sub> O <sub>14</sub>   | 10.46 | [M-H+HCOOH] <sup>-</sup> 845.4922 |
| 18  | Martynoside                             | C <sub>31</sub> H <sub>40</sub> O <sub>15</sub>   | 10.48 | [M-H] <sup>-</sup> 651.2300       |
| 19  | Re                                      | C <sub>48</sub> H <sub>82</sub> O <sub>18</sub>   | 10.48 | [M-H+HCOOH] <sup>-</sup> 991.5514 |
| 20  | Martynoside isomer                      | C <sub>31</sub> H <sub>40</sub> O <sub>15</sub>   | 11.32 | [M-H] <sup>-</sup> 651.2297       |
| 21  | Rf                                      | C <sub>42</sub> H <sub>72</sub> O <sub>14</sub>   | 14.18 | [M-H+HCOOH] <sup>-</sup> 845.4933 |
| 22  | Notoginsenoside R <sub>2</sub>          | C <sub>41</sub> H <sub>70</sub> O <sub>13</sub>   | 14.85 | [M-H+HCOOH] <sup>-</sup> 815.4819 |
| 23  | Rg <sub>2</sub> /isomer                 | C <sub>42</sub> H <sub>72</sub> O <sub>13</sub>   | 15.51 | [M-H+HCOOH] <sup>-</sup> 829.4984 |
| 24  | S-Rh <sub>1</sub>                       | C <sub>36</sub> H <sub>62</sub> O <sub>9</sub>    | 15.68 | [M-H+HCOOH] <sup>-</sup> 683.4381 |
| 25  | S-Rg <sub>2</sub>                       | C <sub>42</sub> H <sub>72</sub> O <sub>13</sub>   | 15.77 | [M-H+HCOOH] <sup>-</sup> 829.4965 |
| 26  | R-Rh <sub>1</sub>                       | C <sub>36</sub> H <sub>62</sub> O <sub>9</sub>    | 16.16 | [M-H+HCOOH] <sup>-</sup> 683.4392 |
| 27  | Ro                                      | C <sub>48</sub> H <sub>76</sub> O <sub>19</sub>   | 16.31 | [M-H] <sup>-</sup> 955.4956       |
| 28  | Rg <sub>6</sub>                         | C <sub>42</sub> H <sub>70</sub> O <sub>12</sub>   | 21.40 | [M-H+HCOOH] <sup>-</sup> 811.4864 |
| 29  | F4                                      | C <sub>42</sub> H <sub>70</sub> O <sub>12</sub>   | 21.63 | [M-H+HCOOH] <sup>-</sup> 811.4875 |
| 30  | Rk3                                     | C <sub>36</sub> H <sub>60</sub> O <sub>8</sub>    | 21.79 | [M-H+HCOOH] <sup>-</sup> 665.4274 |
| 31  | Rh <sub>4</sub>                         | C <sub>36</sub> H <sub>60</sub> O <sub>8</sub>    | 22.03 | [M-H+HCOOH] <sup>-</sup> 665.4273 |
| 32  | Zingibroside R <sub>1</sub>             | C <sub>42</sub> H <sub>66</sub> O <sub>14</sub>   | 22.03 | [M-H] <sup>-</sup> 793.4395       |
| 33  | 20(S)-Rg <sub>3</sub>                   | C <sub>42</sub> H <sub>72</sub> O <sub>13</sub>   | 22.54 | [M-H+HCOOH] <sup>-</sup> 829.4987 |
| 34  | 20(R)-Rg <sub>3</sub>                   | C <sub>42</sub> H <sub>72</sub> O <sub>13</sub>   | 22.65 | [M-H+HCOOH] <sup>-</sup> 829.4972 |
| 35  | Rk <sub>1</sub>                         | C <sub>42</sub> H <sub>70</sub> O <sub>12</sub>   | 23.90 | [M-H+HCOOH] <sup>-</sup> 811.4854 |
| 36  | Rg <sub>5</sub>                         | C <sub>42</sub> H <sub>70</sub> O <sub>12</sub>   | 24.07 | [M-H+HCOOH] <sup>-</sup> 811.4894 |

76 The numbers were in accordance with Figure S6.

77 **TABLE S2** Sequences of primers used for qPCR.

| Gene          | Primer sequence (5'-3')  |                          |
|---------------|--------------------------|--------------------------|
|               | Forward                  | Reverse                  |
| HAVCR1        | ACATATCGTGGAATCACAACGAC  | ACTGCTCTTCTGATAGGTGACA   |
| LCN2          | GCAGGTGGTACGTTGTGGG      | CTCTTGTAGCTCATAGATGGTGC  |
| TNF- $\alpha$ | GCATGATCCGCGACGTGGAA     | AGATCCATGCCGTTGGCCAG     |
| IL-6          | GAGGATAACCACTCCCAACAGACC | AAGTGCATCATCGTTGTTCATACA |
| HDAC1         | TGCTCGCTGCTGGACTTAC      | GTAGGGCAGCTCATTAGGGATCT  |
| HDAC2         | GTTTTGTCAGCTCTCCACGGGT   | CTTGGCATGATGTAGTCCTCCAG  |
| HDAC5         | TGAGAGGCAGGCCCTTCAGT     | CCTCCAGTGCCACTCCCAAC     |
| HDAC6         | ACCGGTATGACCGTGGCACT     | TCCAGGGCACATTGACAGTGA    |
| HDAC9         | TGGAGCAGCAGAGGCAAGAA     | TTGCCACTGCCCTTTCTCGT     |
| GAPDH         | TTCACCACCATGGAGAAGGC     | GGCATGGACTGTGGTCATGA     |

78
